# Supplementary material for: Pyrene-cored dendrimer with carbazole derivatives as dendrons: synthesis, properties and application in white light-emitting diode
Source: Royal Society of Chemistry journal article supplement (doi:10.1039/c1cp21848d), 2011-01-01
Supplement: c1cp21848d.pdf [file c1cp21848d.pdf]

## Supporting Information

# Pyrene-cored dendrimer with carbazole derivatives as dendrons: synthesis, properties and application in white light-emitting diode

Jia You<sup>a</sup>, Guiyang Li<sup>a</sup>, Renjie Wang<sup>b</sup>, Qiuping Nie<sup>a</sup>,

Zhonggang Wang<sup>a,b\*</sup>, Jiuyan Li<sup>b\*</sup>

<sup>a</sup> Department of Polymer Science and Materials, School of Chemical Engineering, Dalian University of Technology, Dalian, 116024, China

<sup>b</sup> State Key Laboratory of Fine Chemicals, Dalian University of Technology, Dalian, 116024, China

Fax: +86-411-84986096; Email: zgwang@dlut.edu.cn

### Figure captions

*Fig. 1S.* <sup>1</sup>H NMR spectrum of P1 in chloroform-d.

*Fig. 2S.* MALDI-TOF-MS spectrum of dendrimer P1.

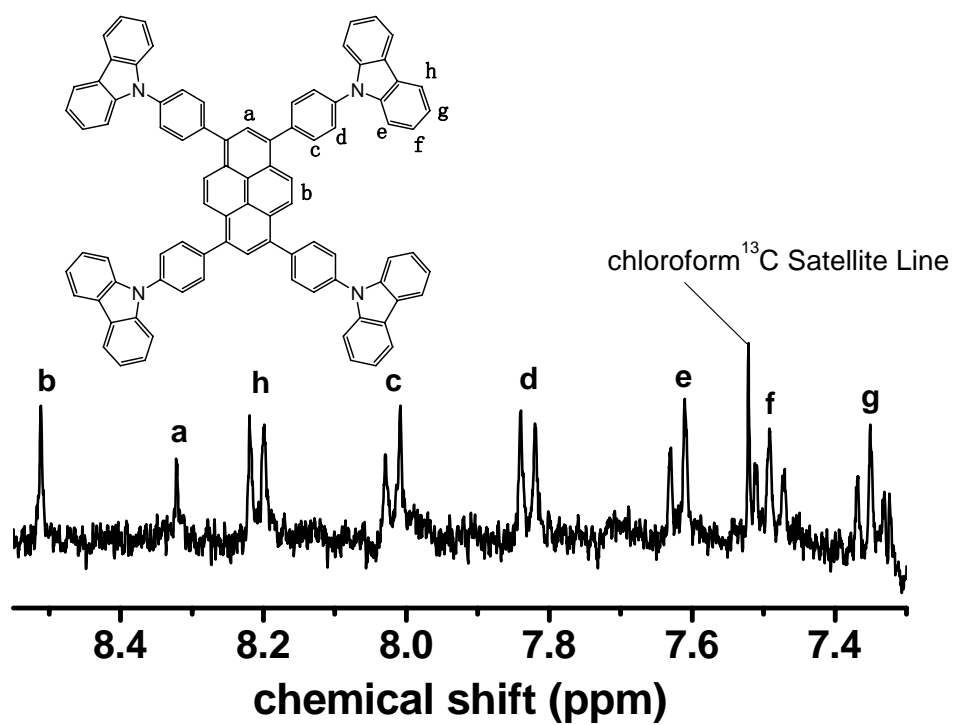

Fig. 1S.  $^1\text{H}$  NMR spectrum of P1 in chloroform-d.

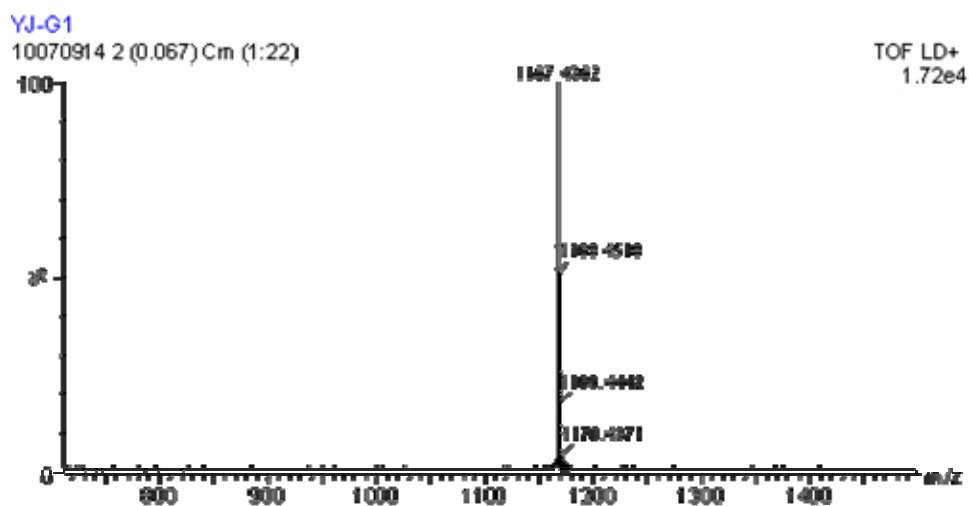

Fig. 2S. MALDI-TOF-MS spectrum of dendrimer P1.
